# Supplementary material
Source: publisher site journal article supplement (https://www.dovepress.com/article/supplementary_file/576376/576376%20Supplementary%20Material.docx)
Supplement: Supplementary file 1 [file 576376%20Supplementary%20Material.docx]

**Supplementary Table 1.** Univariate and Multivariate Analysis of Factors Associated with BASFI Improvement

| Variables | Univariate Analysis | P value | Multivariate Analysis | P value |
| --- | --- | --- | --- | --- |
| Demographics |  |  |  |  |
| Age at surgery, years | 0.89 (0.85-0.94) | 0.099 | 0.95 (0.91-0.99) | 0.042* |
| Gender, male | 1.52 (1.12-2.06) | 0.054 | 1.48 (1.08-2.02) | 0.061 |
| BMI, kg/m² | 0.93 (0.87-0.99) | 0.049* | 0.94 (0.88-1.01) | 0.078 |
| Clinical features |  |  |  |  |
| Smoking history | 0.95 (0.71-1.28) | 0.065 | 0.97 (0.72-1.31) | 0.084 |
| Drinking history | 0.93 (0.67-1.29) | 0.001* | 0.95 (0.68-1.32) | 0.075 |
| Age at onset, years | 0.96 (0.94-0.99) | 0.019* | 0.97 (0.95-1.00) | 0.067 |
| Age at diagnosis, years | 0.97 (0.95-0.99) | 0.029* | 0.98 (0.96-1.01) | 0.082 |
| Laboratory parameters |  |  |  |  |
| ESR, mm/h | 1.58 (1.19-2.10) | 0.015* | 1.52 (1.15-2.01) | 0.015* |
| CRP, mg/L | 1.45 (1.12-1.88) | 0.004* | 1.38 (1.07-1.78) | 0.056 |
| FIB, g/L | 1.32 (1.06-1.64) | 0.012* | 1.28 (1.03-1.59) | 0.072 |
| DD, mg/L | 1.41 (1.15-1.73) | <0.001* | 1.35 (1.10-1.66) | 0.063 |
| Disease assessment |  |  |  |  |
| Preoperative BASDAI | 1.72 (1.28-2.31) | <0.001* | 1.45 (1.07-1.96) | 0.028* |
| Preoperative BASFI | 1.98 (1.32-2.97) | <0.001* | 1.86 (1.24-2.78) | 0.003* |
| Preoperative PCS | 0.82 (0.74-0.91) | <0.001* | 0.88 (0.79-0.98) | 0.052 |
| Preoperative HHS | 0.91 (0.85-0.97) | <0.001* | 0.93 (0.87-0.99) | 0.045* |
| Surgery characteristics |  |  |  |  |
| Surgery type |  | <0.001* |  | 0.064 |
| Head diameter, mm | 1.24 (1.07-1.44) | 0.004* | 1.18 (1.02-1.37) | 0.073 |
| ROM, ° | 0.98 (0.97-0.99) | 0.001* | 0.99 (0.98-1.00) | 0.082 |
| Hip flexion contracture, ° | 0.97 (0.95-0.99) | 0.002* | 0.98 (0.96-1.00) | 0.068 |

Notes: Values are presented as odds ratio (95% confidence interval); Variables with P < 0.1 in univariate analysis were included in multivariate analysis.

*P < 0.05 was considered statistically significant; BMI: body mass index; ESR: erythrocyte sedimentation rate; CRP : C-reactive protein; FIB: fibrinogen; DD: D-dimer; BASDAI: Bath Ankylosing Spondylitis Disease Activity Index; BASFI: Bath Ankylosing Spondylitis Functional Index; PCS: Physical Component Summary; HHS: Harris Hip Score; ROM: range of motion.

**Supplementary Table 2.** Comparison of Baseline Characteristics and Functional Outcomes Between Ankylosing Spondylitis Patients With and Without Biologic Therapy Who Underwent Total Hip Arthroplasty

| Variables | Biologics (n=89) | No Biologics (n=650) | P value |
| --- | --- | --- | --- |
| Baseline characteristics |  |  |  |
| ESR, mm/h | 28.0 (16.0-46.0) | 24.0 (13.0-41.0) | 0.087 |
| CRP, mg/L | 13.5 (6.2-29.4) | 10.2 (4.7-23.8) | 0.065 |
| Preoperative BASFI | 6.4 (5.2-7.6) | 6.1 (4.9-7.3) | 0.421 |
| Preoperative HHS | 40.0 (34.0-47.0) | 41.0 (35.0-48.0) | 0.562 |
| Functional outcomes |  |  |  |
| BASFI improvement ≥20 | 43 (48.3%) | 294 (45.2%) | 0.584 |
| △BASFI | 3.8 (2.6-5.0) | 3.5 (2.4-4.7) | 0.612 |
| △HHS | 44.0 (35.0-52.0) | 43.0 (34.0-51.0) | 0.721 |
| Postoperative HHS | 85.0 (78.0-91.0) | 85.0 (77.0-91.0) | 0.831 |
| Patient satisfaction (very satisfied) | 29 (32.6%) | 206 (31.7%) | 0.874 |

Notes: Values presented as median (IQR) or n (%); △ indicates change from baseline to 24-month follow-up. No significant differences in functional outcomes were observed between groups.

ESR: erythrocyte sedimentation rate; CRP: C-reactive protein; BASFI: Bath Ankylosing Spondylitis Functional Index; HHS: Harris Hip Score.
